# Supplementary material for: Does a 360° VR nature environment augment relaxation during a MBSR breathing meditation?
Source: Research Square preprint supplement (doi:10.21203/rs.3.rs-6954558/v1), 2025-07-18
Supplement: Supplementary file 1 [file 7ae7d86cdbe9e28c81eb4ef8.docx]

# Supplementary Online Materials

# Does a 360° VR nature environment augment relaxation during a MBSR breathing meditation?

Saskia Seel1,2,3 (https://orcid.org/0009-0005-8203-0784), Katja Braun1, Anne-Marie Frantz1, Luna Wurr1 & Gregor Domes1,2 (https://orcid.org/0000-0001-5908-4374)

1 Biological and Clinical Psychology, Department of Psychology, University of Trier, Trier, Germany

2 Institute for Cognitive and Affective Neuroscience, University of Trier, Trier, Germany

3 Clinical Psychology and Psychotherapy in Childhood and Adolescence, Johannes Gutenberg-University Mainz, Mainz, Germany

Corresponding author: Gregor Domes, University of Trier, Department of Biological and Clinical Psychology, Johanniterufer 15, 54290 Trier, Germany. *E-mail address*: [domes@uni-trier.de](mailto:domes@uni-trier.de); *Phone*: +49 651 201 2929; *Fax*: +49 651 201 2934

# 1. Supplementary Methods

**1.1 Trait questionnaires**

*General psychological stress symptoms* were assessed with the Mini-SCL. It consists of 18 items that are rated on a Likert scale of 0-4 (“not at all” – “very much”) and can be summed up into scores that quantify symptom load of depressive, anxious, and somatization disorders, as well as a general score to quantify general psychological burdens. Franke (2017) reports on good internal consistency, as well as moderate to good validity.

*Chronic stress in the last four weeks* was assessed with the TICS-SSCS. It consists of 12 items that are rated on a Likert scale of 0-4 (“never” – “very frequently”) and can be summed up into a score that quantifies burdens of chronic stress symptoms in the last three months with high values indicating high stress. Schulz et al. (2004) report on good internal consistency (Cronbachs Alpha = .87) and good reliability.

*Mindfulness* was assessed with the MAAS. It consists of 15 items that are rated on a Likert scale of 1-5 (“almost always” – “almost never”) and can be calculated into a scale mean; high values indicate a strong trait mindfulness. Michalak et al. (2011) report on good internal consistency (Cronbachs Alpha = .83) and good retest reliability (rtt = .82).

**1.2 State questionnaires**

*Current positive and negative affect* were rated on the PANAS. Its 20 items are rated on a Likert scale of 1-5 (“not at all” – “extremely”). 10 items of them are summed up into a positive affect score and the other 10 are summed into a negative affect score with high values indicating high positive or negative state affect. Breyer and Bluemke (2016) reported on very good internal consistency (Cronbachs Alpha >= .84), but low retest reliability (rtt =< .66).

*Current relaxation* was rated using the RSQ. Its 20 items are rated on a Likert scale of 1-5 (“not correct at all” – “entirely correct”) that are summed up into scored concerning *muscle* behavior (high values indicating strong muscular relaxation), *sleepiness* (high values indicating high sleepiness), *cardiovascular* symptoms (high values indicating slower breathing and heartbeat) and general relaxation (high values indicating high calmness and strong relaxation). Steghaus and Poth (2022) report on good reliability and consistency.

*Presence in the moment* for the groups “2D Display” and “360°-VR” were assessed with the IPQ and the TUI. The IPQ consists of 14 items that are rated on a Likert scale of 0-6 (full disagreement to full agreement to statements). These are summed up into scale scores that indicate *general presence*, *spatial presence*, *involvement* in the displayed environment, as well as *realism* of the environment (high values indicating high presence). The TUI consists of 30 items that are rated on a Likert scale of 1-7 (“not at all” to “very much”). The 4 items used make up the subscale *Immersion* (higher values indicating higher immersion in the used technology). Kothgassner and Felnhofer et al. (2013) reported on good internal consistency (Cronbachs Alpha >= .70).

*Current symptoms of simulator-induced motion sickness* were rated on the SSQ. Its 16 items are rated on a Likert scale from 0-4 (“non” to “severe”) and calculated into weighed means. Higher values indicate higher symptom load in *nausea*, *oculomotor* symptoms, *disorientation*, and a *total score*.

# 2. Supplementary Results

## Table S1. Demographic and psychometric characteristics by condition.

|  | Audio only  (*N*=35/34*) | | 2D Display  (*N*=34) | | 360°-VR  (*N*=31) | |  |  |  |  | |
| --- | --- | --- | --- | --- | --- | --- | --- | --- | --- | --- | --- |
|  | *M* | *SD* | *M* | *SD* | *M* | *SD* | *F* | *df* | *p* | *f* | |
| Age* | 25.65 | 5.76 | 25.97 | 7.14 | 28.32 | 12.19 | 0.905 | 2, 96 | .408 | | .137 |
| Mini-SCL | 54.37 | 6.62 | 55.09 | 8.14 | 54.48 | 7.45 | 0.092 | 2, 97 | .912 | | .043 |
| TICS-SSCS | 54.34 | 7.18 | 52.12 | 12.32 | 52.90 | 8.76 | 0.470 | 2, 97 | .626 | | .098 |
| MAAS | 3.81 | .76 | 4.11 | 1.09 | 4.26 | .68 | 2.316 | 2, 97 | .104 | | .219 |

*Note. For Mini-SCL and TICS-SSCS, T-values are used. For MAAS, arithmetic means are used. Deviating number for age due data input error.*

## Table S2. Additional demographic characteristics and pre-existing experiences by condition.

|  | Audio only  (*N*=35) | 2D Display  (*N*=34) | 360°-VR  (*N*=31) |  |  |  |
| --- | --- | --- | --- | --- | --- | --- |
|  | *N* | *N* | *N* | Chi² | *df* | *p* |
| Sex (females/males/divers) * | 27/8/0 | 26/8/0 | 21/9/1 | - | - | .717 |
| Contraceptive use (yes/no) | 8/19 | 8/18 | 9/12 | 1.087 | 2 | .581 |
| Any relaxation experience (yes/no) | 26/9 | 27/7 | 28/3 | 2.832 | 2 | .243 |
| Yoga | 16/19 | 19/15 | 15/16 | .760 | 2 | .684 |
| Meditation | 21/14 | 21/13 | 21/10 | .456 | 2 | .796 |
| Guided imagery | 18/17 | 16/18 | 17/14 | .397 | 2 | .820 |
| PMR | 12/23 | 12/22 | 17/14 | 3.564 | 2 | .168 |
| Psychotherapy experience (yes/no) | 7/28 | 6/28 | 9/22 | 1.350 | 2 | .509 |
| Caffeine consumption (yes/no) | 3/32 | 3/31 | 2/29 | .148 | 2 | .929 |
| Physical activity (yes/no) | 1/34 | 2/32 | 3/28 | 1.357 | 2 | .507 |
| Smoker (yes/no) | 3/32 | 2/32 | 0/31 | 2.627 | 2 | .269 |
| Cardiovascular disease (yes/no) | 0/35 | 1/33 | 1/30 | 1.106 | 2 | .575 |

*Note. *Distribution by sex was tested with the exact Fisher Test.*

## Table S3. Differences in simulator sickness, mood and relaxation before the intervention by experimental groups.

|  | Audio only  (*N*=35) | | 2D Display  (*N*=34) | | 360°-VR  (*N*=31) | |  |  |  | |
| --- | --- | --- | --- | --- | --- | --- | --- | --- | --- | --- |
|  | *M* | *SD* | *M* | *SD* | *M* | *SD* | *F* | *p* | *f* | |
| SSQ Nausea | 11.99 | 14.70 | 12.91 | 15.20 | 12.93 | 10.89 | 0.051 | .951 | | .032 |
| SSQ Oculomotor | 15.38 | 14.06 | 18.28 | 17.01 | 18.58 | 15.27 | 0.444 | .643 | | .096 |
| SSQ Disorientation | 6.36 | 14.06 | 11.05 | 18.06 | 8.53 | 16.34 | 0.723 | .488 | | .122 |
|  |  |  |  |  |  |  |  |  | |  |
| PANAS positive | 25.31 | 5.61 | 26.21 | 7.05 | 26.65 | 6.08 | 0.390 | .678 | | .090 |
| PANAS negative | 11.91 | 1.67 | 12.09 | 2.82 | 12.55 | 3.30 | 0.492 | .613 | | .101 |
|  |  |  |  |  |  |  |  |  | |  |
| RSQ Muscle | 11.09 | 2.37 | 11.35 | 2.65 | 11.71 | 2.75 | 0.479 | .621 | | .099 |
| RSQ Sleepiness | 7.43 | 2.78 | 7.12 | 2.60 | 8.10 | 2.82 | 1.077 | .345 | | .149 |
| RSQ Cardiovascular | 8.29 | 1.38 | 8.65 | 1.87 | 8.52 | 1.41 | 0.466 | .629 | | .098 |
| RSQ General Relaxation | 6.97 | 1.48 | 7.26 | 2.22 | 7.77 | 1.78 | 1.566 | .214 | | .180 |

## Table S4. Differences between measures of immersion between the augmented groups.

|  | 2D Display  (*N*=34) | | 360°-VR  (*N*=31) | |  |  |  | |  |
| --- | --- | --- | --- | --- | --- | --- | --- | --- | --- |
|  | *M* | *SD* | *M* | *SD* | *t* | *df* | *p* | | *d* |
| IPQ General Presence Score | 2.09 | 1.71 | 3.55 | 1.39 | -3.756 | 63 | | <.001 | .932 |
| IPQ Spatial Presence Score | 1.90 | 1.22 | 3.55 | .97 | -5.989 | 63 | | <.0001 | 1.487 |
| IPQ Involvement Score | 1.97 | 1.23 | 3.01 | 1.43 | -3.151 | 63 | | <.001 | .782 |
| IPQ Realism Score | 1.87 | 1.28 | 2.86 | .88 | -3.628 | 63 | | <.001 | .901 |
|  |  |  |  |  |  |  | |  |  |
| TUI Immersion Stanine | 4.62 | 1.67 | 5.68 | 1.40 | -2.758 | 63 | | <.01 | .685 |

*Note. IPQ: Igroup Presence Questionnaire, TUI: Technology Usage Inventory.*

## Table S5. Group values pre and post treatment in self-reported state variables by condition.

|  | Audio only  *N*=35/25* | | 2D Display  *N*=34/33* | | 360° VR  *N*=31/30* | |
| --- | --- | --- | --- | --- | --- | --- |
|  | *M* | *SD* | *M* | *SD* | *M* | *SD* |
| PANAS Positive pre treatment | 25.31 | 5.61 | 26.21 | 7.05 | 26.65 | 6.08 |
| post treatment | 24.57 | 8.09 | 25.03 | 6.17 | 25.36 | 7.42 |
| PANAS Negative pre treatment | 11.91 | 1.67 | 12.09 | 2.82 | 12.55 | 3.30 |
| post treatment | 10.43 | 0.61 | 11.15 | 1.50 | 11.84 | 2.75 |
| RSQ Muscle Score pre treatment | 11.09 | 2.37 | 11.35 | 2.65 | 11.71 | 2.75 |
| post treatment | 12.29 | 2.30 | 13.12 | 1.89 | 12.42 | 2.19 |
| RSQ Sleepiness Score pre treatment | 7.43 | 2.78 | 7.12 | 2.60 | 8.10 | 2.82 |
| post treatment | 8.26 | 3.13 | 9.77 | 2.73 | 8.55 | 2.97 |
| RSQ Cardiovascular Score pre treatment | 8.29 | 1.38 | 8.65 | 1.87 | 8.52 | 1.41 |
| post treatment | 8.94 | 1.28 | 9.21 | 1.20 | 8.87 | 1.26 |
| RSQ Relaxation Score pre treatment | 6.97 | 1.49 | 7.27 | 2.22 | 7.77 | 1.78 |
| post treatment | 8.29 | 1.18 | 8.27 | 1.58 | 8.23 | 1.88 |
| SSQ Nausea pre treatment | 11.99 | 14.70 | 12.91 | 15.20 | 12.91 | 10.89 |
| post treatment | 8.72 | 10.70 | 10.66 | 12.60 | 8.93 | 9.52 |
| SSQ Oculomotor pre treatment | 15.38 | 14.06 | 18.28 | 17.01 | 18.58 | 15.27 |
| post treatment | 13.43 | 12.21 | 23.63 | 19.64 | 23.72 | 17.26 |
| SSQ Disorientation pre treatment | 6.36 | 14.06 | 11.05 | 18.06 | 8.53 | 16.34 |
| post treatment | 3.58 | 8.50 | 11.46 | 19.53 | 17.06 | 18.22 |
| SSQ Disorientation pre treatment | 0 | 0 | 8.86 | 12.94 | 6.03 | 8.72 |
| corrected* post treatment | 0 | 0 | 9.28 | 15.04 | 15.78 | 17.04 |

*Note*. Due to extreme outliers, SSQ Disorientation was calculated with a deviating dataset, marked with “*”.

## Table S6. Results of (robust) mixed repeated measures ANOVAs for SSQ subscales.

|  | SSQ Nausea | | | |
| --- | --- | --- | --- | --- |
| Source | *df* | *F* | *p* | ηp2 |
| Condition | 2, 97 | 0.145 | .866 | .003 |
| Time | 1, 97 | 7.451 | .008 | .071 |
| Condition x Time | 2, 97 | 0.189 | .828 | .004 |
|  | SSQ Oculomotor | | | |
| Source | *df* | *F* | *p* | ηp2 |
| Condition | 2, 97 | 2.359 | .100 | .046 |
| Time | 1, 97 | 4.536 | .008 | .045 |
| Condition x Time | 2, 97 | 3.312 | .041 | .064 |
|  | SSQ Disorientation* | | | |
| Source | *df* | *F* | *p* | ηp2 |
| Condition | 2, 32.90 | 6.502 | .004 | .283 |
| Time | 1, 40.64 | 3.125 | .085 | .071 |
| Condition x Time | 2, 38.33 | 3.208 | .052 | .143 |
|  | SSQ Disorientation corrected* | | | |
| Source | *df* | *F* | *p* | ηp2 |
| Condition | 2, 26.67 | 8.610 | .001 | .392 |
| Time | 1, 26.59 | 3.888 | .059 | .128 |
| Condition x Time | 2, 26.67 | 2.703 | .085 | .169 |

*Note.* *Due to non-sphericity, a robust two factorial rmANOVA was conducted.

## Table S7. Mean extreme outlier rejections (in %) of inter-beat-intervals by condition.

|  | Audio Only  *N*=24 | 2D Display  *N*=25 | 360-VR  *N*=26 |
| --- | --- | --- | --- |
| Baseline  Treatment, Segment 1  Treatment, Segment 2  Treatment, Segment 3 | 3.57%  1.82%  1.01%  1.27% | 2.97%  1.73%  1.15%  1.48% | 2.99%  1.46%  1.36%  1.72% |
| Total missing data | 1.92% | 1.83% | 1.88% |

*Note.* Aside from *N*=11 data sets that were excluded from analysis due to poor ECG quality (*n*2D Display=5, *n*360° VR=3, *n*Audio only=3), an additional *N*=14 (*n*2D Display=4, *n*360° VR=2, *n*Audio only=8) were excluded due to at least one segment (baseline, relaxation 1, relaxation 2 or relaxation 3) having a poor ECG quality.

## Table S8. Detailed overview of missing data per recording device post data preprocessing.

|  | Audio Only  *N*=35 | 2D Display  *N*=34 | 360-VR  *N*=31 |
| --- | --- | --- | --- |
| Respiratory belt data | | | |
| Complete set  Excluded phases  Baseline  Treatment, Segment 1  Treatment, Segment 2  Treatment, Segment 3  Excluded partial data  Baseline  Treatment, Segment 1  Treatment, Segment 2  Treatment, Segment 3 | 8.57%  0  0  0  0  0.54%  0.65%  0.46%  0.49% | 2.94%  2.94%  0  0  0  0.38%  0.37%  0.04%  0.85% | 0  0  0  0  0  0.25%  0.36%  0.27%  0 |
| Total missing data | 10.71% | 5.33% | 0.88% |
| ECG data | | | |
| Complete set  Excluded phases  Baseline  Treatment, Segment 1  Treatment, Segment 2  Treatment, Segment 3  Excluded partial data  Baseline  Treatment, Segment 1  Treatment, Segment 2  Treatment, Segment 3 | 8.57%  5.00%  0  0.67%  0.71%  1.05%  0.62%  0.36%  0.69% | 14.71%  2.21%  0.74%  0  0  1.31%  0  0.14%  0.49% | 12.90%  0  0  0.81%  0  1.34%  0.20%  0.13%  0.43% |
| Total missing data | 17.67% | 19.59% | 15.82% |
| Galvanic Skin Response data | | | |
| Complete set | 8.57% | 0 | 3.23% |

## Table S9. Mean and standard deviation of breathing frequency, heart rate, heart rate variability and skin conductance level before and during relaxation by treatment groups.

|  |  | Baseline | |  | Treatment, Segment 1 | |  | Treatment, Segment 2 | |  | Treatment, Segment 3 | |
| --- | --- | --- | --- | --- | --- | --- | --- | --- | --- | --- | --- | --- |
| condition | N | M | SD |  | M | SD |  | M | SD |  | M | SD |
| Breathing frequency (breaths per minute) | | | | | | | | | | | | |
| Audio only | 32 | 16.12 | 2.73 |  | 11.96 | 2.78 |  | 9.94 | 2.47 |  | 11.08 | 2.69 |
| 2D-Display | 31 | 16.83 | 2.83 |  | 12.06 | 3.33 |  | 11.52 | 3.46 |  | 12.44 | 3.42 |
| 360°-VR | 31 | 15.86 | 2.46 |  | 11.50 | 2.98 |  | 11.08 | 3.07 |  | 11.86 | 3.43 |
| Heart rate (beats per minute) | | | | | | | | | | | | |
| Audio only | 24 | 75.57 | 10.04 |  | 71.09 | 9.15 |  | 71.94 | 8.28 |  | 71.53 | 8.63 |
| 2D-Display | 25 | 76.20 | 11.98 |  | 73.11 | 11.12 |  | 73.25 | 10.44 |  | 73.15 | 10.91 |
| 360°-VR | 26 | 72.30 | 10.18 |  | 69.32 | 9.26 |  | 69.55 | 8.96 |  | 69.36 | 9.19 |
| HRV: RMSSD (ms) | | | | | | | | | | | | |
| Audio only | 23 | 38.80 | 17.29 |  | 53.49 | 22.94 |  | 56.52 | 24.86 |  | 51.59 | 24.43 |
| 2D-Display | 24 | 40.54 | 23.48 |  | 47.20 | 25.17 |  | 48.78 | 27.34 |  | 46.96 | 23.50 |
| 360°-VR | 24 | 41.48 | 28.41 |  | 45.26 | 28.00 |  | 44.85 | 29.88 |  | 46.86 | 32.46 |
| HRV: pNN50 (%) | | | | | | | | | | | | |
| Audio only | 24 | 20.59 | 18.64 |  | 29.66 | 18.34 |  | 29.70 | 17.16 |  | 29.09 | 19.72 |
| 2D-Display | 25 | 21.76 | 22.58 |  | 25.98 | 20.69 |  | 26.61 | 20.71 |  | 26.43 | 20.29 |
| 360°-VR | 26 | 24.45 | 25.19 |  | 26.79 | 24.49 |  | 24.72 | 22.20 |  | 25.52 | 24.30 |
| Skin conductance level (micro-siemens) | | | | | | | | | | | | |
| Audio only | 32 | 3.57 | 1.38 |  | 3.65 | 1.35 |  | 3.09 | 1.23 |  | 2.97 | 1.19 |
| 2D-Display | 31 | 4.11 | 1.94 |  | 4.12 | 1.75 |  | 3.72 | 1.58 |  | 3.64 | 1.58 |
| 360°-VR | 29 | 3.14 | 1.47 |  | 3.42 | 1.46 |  | 3.07 | 1.32 |  | 2.92 | 1.28 |
